# Supplementary material for: A novel regulation mechanism of the T7 RNA polymerase based expression system improves overproduction and folding of membrane proteins
Source: PubMed Central journal article supplement (PMC5988807; doi:10.1038/s41598-018-26668-y), 2018-06-05
Supplement: 41598_2018_26668_MOESM1_ESM.pdf [file 41598_2018_26668_MOESM1_ESM.pdf]

## **A novel regulation mechanism of the T7 RNA polymerase based expression system improves overproduction and folding of membrane proteins**

Federica Angius<sup>1</sup>, Oana Iliaia<sup>1</sup>, Amira Amrani<sup>1</sup>, Annabelle Suisse<sup>1,2</sup>, Lindsay Rosset<sup>1</sup>,  
Amélie Legrand<sup>1</sup>, Abbas Abou-Hamdan<sup>1,3</sup>, Marc Uzan<sup>1</sup>, Francesca Zito<sup>1</sup> and Bruno  
Miroux<sup>1</sup>

<sup>1</sup> Laboratoire de Biologie Physico-Chimique des Protéines Membranaires, Institut de  
Biologie Physico-Chimique, CNRS, UMR7099, University Paris Diderot, Sorbonne Paris  
Cité, Paris, France

<sup>2</sup> Present address: Helen L. and Martin S. Kimmel Center at the Skirball Institute for  
Biomolecular Medicine and Department of Cell Biology, NYU School of Medicine, New  
York, USA

<sup>3</sup> Present address: Institut de Biologie Intégrative de la Cellule, CNRS, Gif sur Yvette,  
France

Correspondence address :

[Bruno.Miroux@ibpc.fr](mailto: Bruno.Miroux@ibpc.fr)

Laboratoire de Biologie Physico-Chimique des Protéines Membranaires, UMR7099-  
CNRS IBPC, 13 rue Pierre et Marie Curie 75005 Paris, France

Telephone: 33 1 58 41 52 25

Fax: 33 1 58 41 52 24

### **Keywords:**

production of membrane proteins, *E. coli*, T7 RNA polymerase

**Table S1: analysis of the sfGFP fluorescent intensity in expression hosts**

| Bacterial host | Induction | Total mean RFI <sup>1</sup> (SEM <sup>2</sup> ) | RFI mean (% population) |                   |
|----------------|-----------|-------------------------------------------------|-------------------------|-------------------|
|                |           |                                                 | Low <sup>3</sup>        | High <sup>4</sup> |
| BL21           | +IPTG     | 296 (16)                                        | 216(98)                 | 4021(2)           |
| BL21           | -IPTG     | 278(27)                                         | 244(99)                 | 2836(1)           |
| BL21(DE3)      | +IPTG     | 184,728 (29,173)                                | 869 (81)                | 965,333 (19)      |
| BL21(DE3)      | -IPTG     | 788,656 (35,374)                                | 368 (5)                 | 832,333 (95)      |
| C41(DE3)       | +IPTG     | 1,102,447 (24,083)                              | 5,153 (7)               | 1,186,667 (93)    |
| C41(DE3)       | -IPTG     | 223,500 (10,838)                                | 434 (6)                 | 238,935 (94)      |
| C43(DE3)       | +IPTG     | 713,016 (27,837)                                | 980 (6)                 | 754,666 (94)      |
| C43(DE3)       | -IPTG     | 36,615 (346)                                    | 792 (32)                | 53,394 (68)       |
| C44(DE3)       | +IPTG     | 60,988 (23,242)                                 | 130 (3)                 | 37,979 (97)       |
| C44(DE3)       | -IPTG     | 1,268 (52)                                      | 359 (89)                | 7,688 (11)        |
| C45(DE3)       | +IPTG     | 157,115 (5,239)                                 | 262 (2)                 | 159,361 (98)      |
| C45(DE3)       | -IPTG     | 4,717 (385)                                     | 468 (60)                | 11,082 (40)       |

<sup>1</sup> RFI, relative fluorescence intensity after overnight induction <sup>2</sup>SEM standard error of the mean in three independent experiments; <sup>3</sup>Low RFI population, <sup>4</sup>High RFI population.

**Table S2. Membrane proteins used in this study**

| <b>Protein name</b>                                                     | <b>Origin</b>                 | <b>Molecular weight/TM</b> | <b>Fusion partner</b> | <b>UniprotKB number</b> |
|-------------------------------------------------------------------------|-------------------------------|----------------------------|-----------------------|-------------------------|
| YidC -Membrane protein insertase                                        | <i>Escherichia coli</i>       | 60 kDa<br>6 TM             | GFPd                  | NP_418161               |
| PheP -Phenylalanine-specific permease                                   | <i>Escherichia coli</i>       | 50 kDa<br>12 TM            | GFPe                  | NP_415108               |
| YijD -Inner membrane protein                                            | <i>Escherichia coli</i>       | 13 kDa<br>4 TM             | GFPe                  | P_418399                |
| GltP-Glutamate-aspartate symport protein                                | <i>Escherichia . coli</i>     | 47 kDa<br>10 TM            | GFPd                  | ACI73820                |
| YfbF-Undecaprenyl-phosphate 4-deoxy-4-formamido-L-arabinose transferase | <i>Escherichia coli</i>       | 36 kDa<br>2 TM             | GFPe                  | YP_002408357            |
| YgfU-Uric acid transporter                                              | <i>Escherichia coli</i>       | 50 kDa<br>13 TM            | GFPe                  | KLX82054                |
| YqcE-Inner membrane protein                                             | <i>Escherichia coli</i>       | 46 kDa<br>12 TM            | GFPe                  | ANK03046                |
| Ct6 Mot A proton channel                                                | <i>Chlorbium tepidum</i>      | 46 kDa<br>4 TM             | GFPe                  | Q8KC40                  |
| Dr10 MscS channel                                                       | <i>Deinococcus tepidum</i>    | 40 kDa<br>5 TM             | GFPe                  | Q9RXU5                  |
| Dr 35 Multidrug efflux transporter                                      | <i>Deinococcus tepidum</i>    | 44 kDa<br>12 TM            | GFPe                  | Q9RZF0                  |
| DV1 Na/Ca exchanger family                                              | <i>Desulfovibrio vulgaris</i> | 44 kDa<br>12 TM            | GFPe                  | Q723816                 |
| Ph1 CIC channel                                                         | <i>Pyrococcus horikoshi</i>   | 40 kDa<br>11 TM            | GFPe                  | Q8U0I6                  |
| Dv12 Na/H antiporter                                                    | <i>Desulfovibrio vulgaris</i> | 45 kDa<br>13 TM            | GFPe                  | Q72AL4                  |
| Dv 3 MFS transporter                                                    | <i>Desulfovibrio vulgaris</i> | 40 kDa<br>11TM             | GFPe                  | Q72WJ3                  |
| Sp17 Formate/nitrate                                                    | <i>Silicibacter</i>           | 26 kDa                     | GFPe                  | Q5LW76                  |

|                                                                               |                                     |                    |      |             |
|-------------------------------------------------------------------------------|-------------------------------------|--------------------|------|-------------|
| family transporter                                                            | <i>pomeroy</i>                      | 10TM               |      |             |
| Oo3 MscS channel                                                              | <i>Oenococcus oeni</i>              | 32 kDa<br>3 TM     | GFPe | Q04DD4      |
| Tt14 transporter                                                              | <i>Thermus<br/>thermophilus</i>     | 42 kDa<br>10 TM    | GFPe | Q72HL7      |
| Gs21 Ms channel<br>superfamily                                                | <i>Geobacter<br/>sulfurreducens</i> | 60 kDa<br>6 TM     | GFPe | Q74CF1      |
| Ss21 amino acid<br>transporter-like iron(III)<br>ABC transporter,<br>permease | <i>Sulfolobus<br/>solfataricus</i>  | 49 kDa<br>12 TM    | GFPe | NP_343113.1 |
| SQR: Sulfide:quinone<br>oxidoreductase                                        | human                               | 50kDa<br>monotopic | None | Q9Y6N5      |

---

**Table S3: analysis of the toxicity of the expression plasmids**

| <b>Bacterial host</b>      | <b>BL21(DE3)</b>                    | <b>C44(DE3)</b> | <b>C45(DE3)</b> |
|----------------------------|-------------------------------------|-----------------|-----------------|
| <b>Growth medium</b>       | <b>LB</b>                           | <b>2xTY</b>     | <b>2xTY</b>     |
| <b>Expression plasmids</b> | <b>RCSA=SA(+IPTG)/SA(-IPTG) (%)</b> |                 |                 |
| pHis17 - sfGFP             | 0                                   | 116             | 40              |
| pET28a+ - YijD-GFP         | 0                                   | 82              | 53              |
| pET28a+ - PheP-GFP         | 0                                   | 102             | 200             |
| pET28a+ - YgfU-GFP         | 0                                   | 105             | 57              |
| pET28a+ - YqcE-GFP         | 0                                   | 62              | 156             |
| pET28a+ - YidC-GFP         | 0                                   | 77              | 43              |
| pET28a+ - GltP-GFP         | 0                                   | 90              | 143             |
| pET28a+ - YfbF-GFP         | 0                                   | 143             | 200             |
| pLIC - Ct6-EGFP            | 0                                   | 81              | 30              |
| pLIC - Dr10-EGFP           | 0                                   | 81              | 70              |
| pLIC - Dr35-EGFP           | 0                                   | 71              | 32              |
| pLIC - Dv1-EGFP            | 0                                   | 41              | 40              |
| pLIC - Ph1-EGFP            | 0                                   | 32              | 0               |
| pLIC - Dv12-EGFP           | 0                                   | 85              | 67              |
| pLIC - Dv3-EGFP            | 0                                   | 49              | 42              |
| pLIC - Sp17-EGFP           | 0                                   | 40              | 38              |
| pLIC - Tt14-EGFP           | 0                                   | 57              | 34              |
| pLIC - Oo3-EGFP            | 0                                   | 49              | 45              |
| pLic - Ss21-EGFP           | 0                                   | 58              | 11              |
| pLic - Gs21-EGFP           | 0                                   | 16              | 0               |
| <b>Bacterial host</b>      | <b>C43(DE3)</b>                     | <b>C44(DE3)</b> | <b>C45(DE3)</b> |
| pHis17hSQR                 | 120                                 | 126             | 59              |

**Table S4: PCR primers used to confirm mutations in C44(DE3) and C45(DE3)**

| <b>Name</b>              | <b>Sequence</b>          | <b>Bacterial mutant</b> |
|--------------------------|--------------------------|-------------------------|
| Gene 1 for               | GGCCCTTGAGCATGAGTCTT     | C44(DE3)                |
| Gene 1 rev               | GAGACTCGTGCAACTGGTCA     | C44(DE3)                |
| rbsD for                 | TGATATTTTCATCGGTGATCTCCC | C44(DE3)                |
| rbsD rev                 | CGAATTTCAATGGTATTTCCCTG  | C44(DE3)                |
| Gene 1 for (PCR)         | GGCCCTTGAGCATGAGTCTT     | C45(DE3)                |
| Gene 1 rev (PCR)         | GAGACTCGTGCAACTGGTCA     | C45(DE3)                |
| Gene 1 sequencing primer | TCTGGCTTGCCTAACCAGTG     | C45(DE3)                |
| rbsD for                 | TGATATTTTCATCGGTGATCTCCC | C45(DE3)                |
| rbsD rev                 | CGAATTTCAATGGTATTTCCCTG  | C45(DE3)                |
| gltL for                 | CGGTGCAGCAAGGTGAAATC     | C45(DE3)                |
| gltL rev                 | CTGCGCCGGAAACTTATTGG     | C45(DE3)                |
| YcdX for                 | AGTGGTTGATGGGGTAGGGA     | C45(DE3)                |
| YcdX rev                 | TCGCTTGTGTATTGGTCGCT     | C45(DE3)                |
| B-lom for                | GCGCGAATATGCCGGTTATC     | C45(DE3)                |
| B-lom rev                | GCCACCTCTTCCACCATCAG     | C45(DE3)                |

**Table S5: Genetic changes in C41(DE3) and C43(DE3) bacterial hosts**

| <b>Gene</b>                            | <b>Function</b>                                                     | <b>Mutation</b> | <b>Position from nucleotide 1 of coding sequence</b> | <b>Region</b> | <b>Effect</b>              |
|----------------------------------------|---------------------------------------------------------------------|-----------------|------------------------------------------------------|---------------|----------------------------|
| <b><i>Present only in C41(DE3)</i></b> |                                                                     |                 |                                                      |               |                            |
| <b><i>proY</i></b>                     | Predicted cryptic proline transporter                               | T → A*          | 438                                                  | coding        | Synonymous                 |
| <b><i>melB</i></b>                     | Melibiose:sodium symporter                                          | C → T*          | 653                                                  | coding        | Ala → Val                  |
| <b><i>ycgO</i></b>                     | Potassium/proton antiporter                                         | C → A*          | 1103                                                 | coding        | Gly → Val                  |
| <b><i>yhhA</i></b>                     | Hypothetical protein                                                | C → T*          | 290                                                  | coding        | Pro → Leu                  |
| <b><i>ydcD</i></b>                     | Hypothetical protein                                                | G → A           | 71                                                   | coding        | Gly → Glu                  |
| <b><i>zwf</i></b>                      | Glucose-6-phosphate 1-dehydrogenase                                 | C → A           | 815                                                  | coding        | Ala → Asp                  |
| <b><i>rpoC</i></b>                     | DNA-directed RNA polymerase subunit beta                            | G → T           | 3023                                                 | coding        | Gly → Val                  |
| <b><i>Present only in C43(DE3)</i></b> |                                                                     |                 |                                                      |               |                            |
| <b><i>dcuS</i></b>                     | Sensor of fumarate two component system; frame-shifted in BL21(DE3) | GCGCC deletion* | 866–870                                              | coding        | Frameshift                 |
| <b><i>fur</i></b>                      | Ferric uptake regulator                                             | insertion*      | 392                                                  | coding        | Val insertion              |
| <b><i>lacI</i></b>                     | <i>lac</i> repressor                                                | G → T*          | 574                                                  | coding        | al → Phe                   |
| <b><i>lon</i></b>                      | DNA-binding ATP-dependent protease La                               | IS4 excision*   | – 156 from <i>lon</i>                                | intergenic    | Activation of Lon protease |
| <b><i>yibJ</i></b>                     | Predicted Rhs-                                                      | C → A*          | 90                                                   | coding        | Synonymous                 |

---

|                                                     |                                                                                        |                  |                                                        |          |           |
|-----------------------------------------------------|----------------------------------------------------------------------------------------|------------------|--------------------------------------------------------|----------|-----------|
|                                                     | family protein                                                                         |                  |                                                        |          |           |
| <b><i>yjcO</i></b>                                  | Hypothetical protein                                                                   | A → G*           | 665                                                    | Coding   | Glu → Gly |
| <b><i>cydA</i></b>                                  | Cytochrome d terminal oxidase, subunit I                                               | IS1 insertion*   | - 262 from <i>cydA</i>                                 | Promoter | N.D.      |
| <b><i>ccmF</i></b><br>~<br><b><i>ompC</i></b>       |                                                                                        | IS1 deletion*    | 21-kb large deletion                                   | N.D.     |           |
| <b><i>yjiV</i></b><br>~<br><b><i>yjjN</i></b> *     |                                                                                        | IS1 deletion*    | 37-kb large deletion                                   | N.D.     |           |
| <b><i>Present in both C41(DE3) and C43(DE3)</i></b> |                                                                                        |                  |                                                        |          |           |
| <b><i>l</i></b>                                     | T7 DNA-directed RNA polymerase                                                         | AA -> GT, G -> A | <i>PlacUV5</i> - 10<br><i>PlacUV5</i> CAP binding site | Promoter |           |
| <b><i>rbsD</i></b>                                  | Predicted cytoplasmic sugar binding protein; disrupted by insertion of IS in BL21(DE3) | IS3 excision**   | 217-1586                                               | Coding   | N.D.      |
| <b><i>yehU</i></b>                                  | Predicted sensory kinase in two component system                                       | T -> G           | 679                                                    | Coding   | Phe → Val |

---

\*Mutation identified in the publication of Kwon and coworkers (Kwon et al. 2015);

\*\*change also identified in C44(DE3) and C45(DE3).



**Table S6. Genetic changes in C44(DE3) and C45(DE3) bacterial hosts.**

| <b>Gene</b>                                         | <b>Function</b>                                                   | <b>Mutation</b>              | <b>Chromosomal coordinate of the mutations</b> | <b>Effect</b>                                               |
|-----------------------------------------------------|-------------------------------------------------------------------|------------------------------|------------------------------------------------|-------------------------------------------------------------|
| <b><i>Present only in C44(DE3)</i></b>              |                                                                   |                              |                                                |                                                             |
| <b>T7, 1</b>                                        | T7 RNA polymerase                                                 | C → T                        | 752,380                                        | Gln <sub>656</sub> → TAG ( <i>ambre</i> )                   |
| <b><i>Present only in C45(DE3)</i></b>              |                                                                   |                              |                                                |                                                             |
| <b>T7, 1</b>                                        | T7 RNA polymerase                                                 | T → G                        | 751,489                                        | Glu <sub>359</sub> → TAA ( <i>ochre</i> )                   |
| <b><i>gltL</i></b>                                  | Glutamate/aspartate ATP binding protein subunit                   | Deletion of insJK2 insertion | 642,461-643,903                                | Restore Leu <sub>118</sub> in frame with Lys <sub>119</sub> |
| <b><i>B-lom</i></b>                                 | DE3 Δ(B, C, nu3, D, E, Fii, Z, U, V, G, T, H, M, L, K, I, J, lom) | Deletion                     | 771,453-788,063                                | from B(Leu <sub>49</sub> ) to lom(Phe <sub>206</sub> )      |
| <b><i>ycdX</i></b>                                  | Hypothetical protein                                              | Deletion                     | 1,101,730-1,101,744                            | Frameshift from Phe <sub>100</sub>                          |
| <b><i>Present in both C44(DE3) and C45(DE3)</i></b> |                                                                   |                              |                                                |                                                             |
| <b><i>rbsD</i></b>                                  | D-ribose pyranase                                                 | Deletion of insJK5 insertion | 3,822,152-3,824,017                            | Restore Val <sub>64</sub> in frame with Asp <sub>65</sub>   |

**Table S7: real time quantitative PCR primers**

| <b>Name</b> | <b>Sequence</b>       |
|-------------|-----------------------|
| sfGFP f     | ACCCGGATCACATGAAGCAG  |
| sfGFP r     | CAGGATGTTGCCGTCCTCTT  |
| ihf f       | CAAGACGGTTGAAGATGCAGT |
| ihf r       | GCAAAGAGAAACTGCCGAAA  |
| T7 RNA P f  | AGTCAAGCTGGGCACTAAGG  |
| T7 RNA P r  | CACTGCGAGTAACACCGTGA  |

**Table S8: ANOVA test values**

| <b>Figure 3A</b> |                  |                         |                        |                        |
|------------------|------------------|-------------------------|------------------------|------------------------|
| <b>Plasmid</b>   | <b>F-value</b>   | <b>p-value</b>          |                        |                        |
|                  |                  | BL21(DE3) /<br>C45(DE3) | BL21(DE3)/<br>C44(DE3) | C45(DE3) /<br>C44(DE3) |
| YidC - GFP       | F (2, 6) = 166.0 | P < 0.0001              | P = 0.9999             | P < 0.0001             |
| PheP - GFP       | F (2, 6) = 9.311 | P = 0.0240              | P = 0.9934             | P = 0.0212             |
| YijD - GFP       | F (2, 6) = 23.55 | P = 0.0013              | P = 0.0080             | P = 0.1956             |
| GltP - GFP       | F (2, 6) = 424.7 | P < 0.0001              | P < 0.0001             | P < 0.0001             |
| YfbF - GFP       | F (2, 6) = 321.5 | P < 0.0001              | P < 0.0001             | P = 0.0003             |
| YgfU - GFP       | F (2, 6) = 172.1 | P < 0.0001              | P < 0.0001             | P = 0.0026             |
| YqcE - GFP       | F (2, 6) = 13.26 | P = 0.0258              | P = 0.0060             | P = 0.4168             |

**Table S8: ANOVA test values  
Figure 3B**

| Plasmid    | F-value           | p-value                |                        |                        |                        |                       |                    |                       |                    |                       |                       |
|------------|-------------------|------------------------|------------------------|------------------------|------------------------|-----------------------|--------------------|-----------------------|--------------------|-----------------------|-----------------------|
|            |                   | BL21(DE3)<br>/C41(DE3) | BL21(DE3)<br>/C43(DE3) | BL21(DE3)<br>/C44(DE3) | BL21(DE3)<br>/C45(DE3) | C41(DE3)<br>/C43(DE3) | C41(DE3)<br>/(DE3) | C41(DE3)<br>/C45(DE3) | C43(DE3)<br>/(DE3) | C43(DE3)<br>/C45(DE3) | C44(DE3)<br>/C45(DE3) |
| Ct6 - GFP  | F (4, 22) = 10.42 | 0.3832                 | 0.7888                 | 0.0008                 | 0.0020                 | 0.9101                | 0.0129             | 0.0362                | 0.0017             | 0.0052                | 0.9897                |
| Dr10 - GFP | F (4, 25) = 7.343 | 0.9899                 | 0.9975                 | 0.0336                 | 0.0023                 | >0.9999               | 0.0906             | 0.0073                | 0.0679             | 0.0052                | 0.7990                |
| Dr35 - GFP | F (4, 25) = 14.82 | 0.1583                 | 0.0808                 | <0.0001                | <0.0001                | 0.9968                | 0.0016             | 0.0188                | 0.0039             | 0.0411                | 0.8532                |
| Dv1 - GFP  | F (4, 25) = 11.10 | 0.1196                 | 0.6058                 | <0.0001                | 0.0035                 | 0.8207                | 0.0115             | 0.5383                | 0.0008             | 0.0963                | 0.2841                |
| Ph1 - GFP  | F (4, 22) = 1.875 | 0.8329                 | 0.9948                 | 0.1890                 | 0.8212                 | 0.9275                | 0.5640             | >0.9999               | 0.1774             | 0.9182                | 0.5820                |
| Dv12 - GFP | F (4, 25) = 9.746 | 0.9994                 | 0.9999                 | 0.0010                 | 0.0092                 | >0.9999               | 0.0018             | 0.0159                | 0.0015             | 0.0131                | 0.9006                |
| Dv3 - GFP  | F (4, 25) = 9.953 | 0.3195                 | 0.4955                 | <0.0001                | 0.0516                 | 0.9975                | 0.0034             | 0.8643                | 0.0015             | 0.6960                | 0.0348                |
| Sp17 - GFP | F (4, 25) = 8.689 | 0.9980                 | 0.9992                 | 0.0007                 | 0.0532                 | >0.9999               | 0.0016             | 0.1004                | 0.0013             | 0.0882                | 0.4019                |
| Oo3 - GFP  | F (4, 22) = 8.613 | 0.0965                 | 0.3155                 | 0.0157                 | <0.0001                | 0.8344                | 0.9995             | 0.3133                | 0.5527             | 0.0102                | 0.2353                |
| Tt14 - GFP | F (4, 25) = 8.370 | 0.1842                 | 0.9046                 | 0.0002                 | 0.0276                 | 0.6272                | 0.0486             | 0.8856                | 0.0017             | 0.1681                | 0.2824                |
| Gs21 - GFP | F (4, 20) = 6.406 | 0.2086                 | 0.5348                 | 0.0873                 | 0.0007                 | 0.9614                | 0.9882             | 0.0934                | 0.7798             | 0.0239                | 0.2213                |
| Ss21 - GFP | F (4, 20) = 6.415 | 0.0094                 | 0.0038                 | 0.6796                 | 0.7230                 | 0.9939                | 0.1439             | 0.1256                | 0.0666             | 0.0573                | >0.9999               |

---

**Table S8: ANOVA test values****Figure 6A**

---

| <b>Minutes after induction</b> | <b>F-value</b>    | <b>p-value</b> |
|--------------------------------|-------------------|----------------|
| <b>0</b>                       | F (2, 12) = 67.33 | P < 0.0001     |
| <b>30</b>                      | F (2, 8) = 0.2827 | P = 0.7610     |
| <b>60</b>                      | F (2, 12) = 4.780 | P = 0.0297     |
| <b>120</b>                     | F (2, 11) = 84.02 | P < 0.0001     |

**Figure 6B**

| <b>Minutes after induction</b> | <b>F-value</b>    | <b>p-value</b> |
|--------------------------------|-------------------|----------------|
| <b>0</b>                       | F (2, 14) = 152.8 | P < 0.0001     |
| <b>30</b>                      | F (2, 14) = 99.73 | P < 0.0001     |
| <b>60</b>                      | F (2, 16) = 6.312 | P = 0.0095     |
| <b>120</b>                     | F (2, 24) = 147.3 | P < 0.0001     |

**Figure 6C**

| <b>Condition</b> | <b>F-value</b>   | <b>p-value</b> |
|------------------|------------------|----------------|
| <b>- IPTG</b>    | F (3, 8) = 55.44 | P < 0.0001     |
| <b>+ IPTG</b>    | F (3, 8) = 81.18 | P < 0.0001     |

---

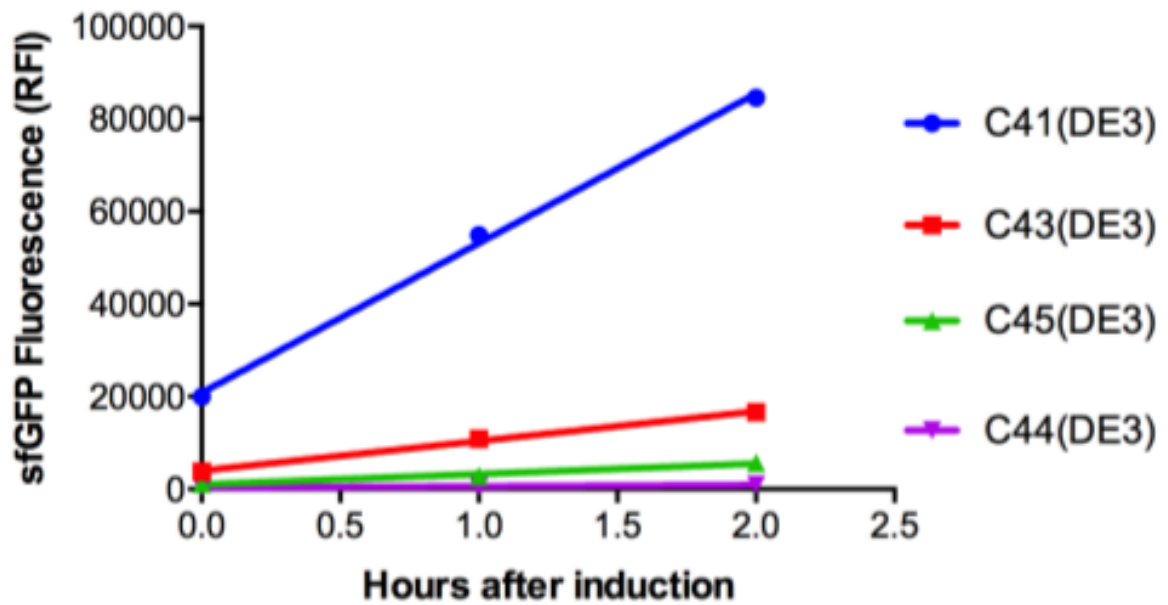

**Figure S1. Analysis of sfGFP RFI in BL21(DE3) derivatives**

C44(DE3) and C45(DE3) bacterial hosts were transformed with pHis17-sfGFP expression vector. 200,000 cells were counted and analyzed by flow cytometry for sfGFP relative fluorescence intensity (RFI). The graph represents the Initial rate of sfGFP fluorescence in C44(DE3) and C45(DE3) compared to C41(DE3) and C43(DE3).

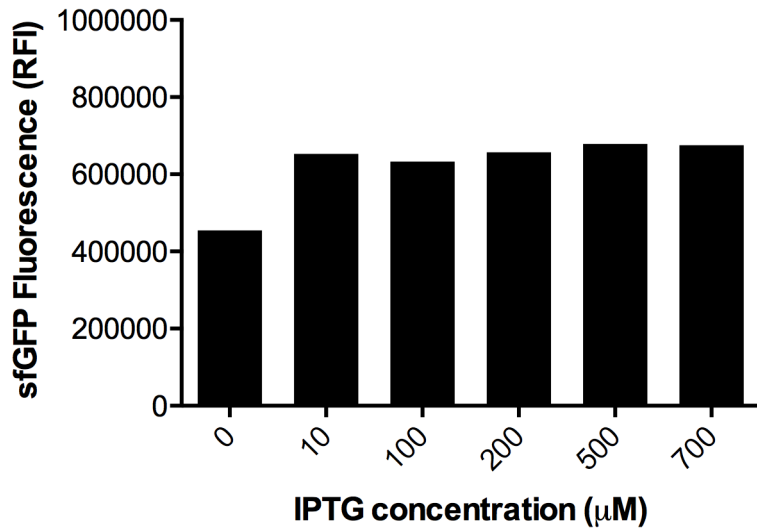

**Figure S2. Regulation of the T7 expression system in BL21(DE3)**

BL21(DE3) were transformed with pHis17-sfGFP expression vector. 200,000 cells were counted and analyzed for sfGFP RFI. Cells were induced at OD<sub>600</sub> 0.4 with increasing concentration of IPTG. The sfGFP RFI was recorded the next day after overnight induction.

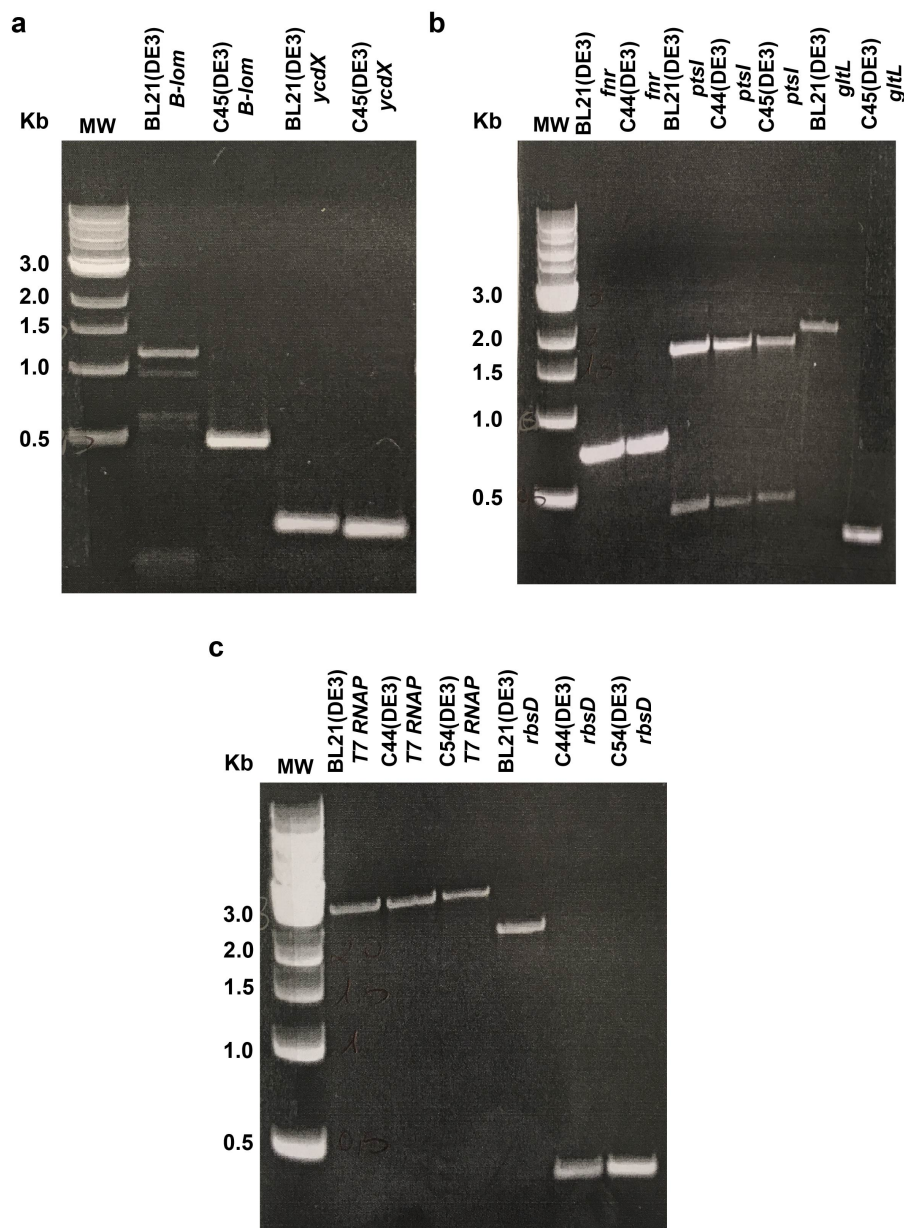

**Figure S3. Confirmation of mutations in C44(DE3) and C45(DE3) bacterial hosts by PCR amplification and sequencing. (a) *B-lom* and *ycdX* C45(DE3) mutations compared to BL21(DE3) on agarose gel. (b) *gltL* C45(DE3) mutation compared to BL21(DE3) on agarose gel. The five lines before showing *fnr* and *ptsI* genes DNA are not of interest of this paper. (c) *T7 RNAP* and *rbsD* mutation in C44(DE3) and C45(DE3) compared to BL21(DE3) on agarose gel.**
